# Supplementary material
Source: Springer Nature journal article supplement (https://www.springermedizin.de/resource/supplementary/12889_2013_5921_MOESM1_ESM.pdf/9496576)

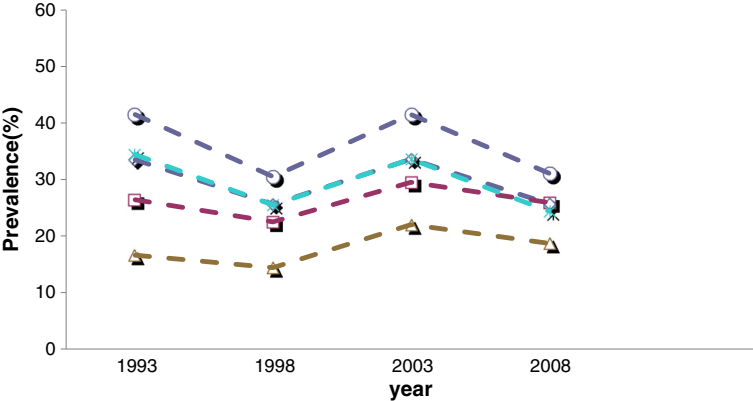

◆ Total stunting    □ Urban, males    △ Urban, females  
○ Rural, males    \* Rural, females

Supplement: MOESM1 [file 9496576]
